# Inferring Disease Risk Genes from Sequencing Data in Multiplex Pedigrees Through Sharing of Rare Variants

Running title: Sharing of Rare Variants to Infer Disease Genes

Alexandre Bureau<sup>1,2\*</sup>, Ferdouse Begum<sup>3</sup>, Margaret A. Taub<sup>4</sup>,  
Jacqueline Hetmanski<sup>3</sup>, Margaret M. Parker<sup>5</sup>, Hasan Albacha-Hejazi<sup>6</sup>,  
Alan F. Scott<sup>7</sup>, Jeffrey C. Murray<sup>8</sup>, Mary L. Marazita<sup>9</sup>,  
Joan E. Bailey-Wilson<sup>10</sup>, Terri H. Beaty<sup>3</sup>, Ingo Ruczinski<sup>4</sup>

<sup>1</sup> Département de Médecine Sociale et Préventive, Université Laval, Québec, Canada.

<sup>2</sup> Centre de recherche CERVO, Québec, Canada.

<sup>3</sup> Department of Epidemiology, Johns Hopkins Bloomberg School of Public Health, Baltimore, MD, USA.

<sup>4</sup> Department of Biostatistics, Johns Hopkins Bloomberg School of Public Health, Baltimore, MD, USA.

<sup>5</sup> Channing Division of Network Medicine, Harvard Medical School, Boston, MA, USA.

<sup>6</sup> Prime Health Clinic Jeddah, Riyadh, Saudi Arabia.

<sup>7</sup> Institute of Genetic Medicine, Johns Hopkins Medical Institutions, Baltimore, MD, USA.

<sup>8</sup> Department of Pediatrics, School of Medicine, University of Iowa, Iowa City, IA, USA.

<sup>9</sup> Department of Oral Biology, School of Dental Medicine, University of Pittsburgh, Pittsburgh, PA, USA.

<sup>10</sup> Inherited Disease Research Branch, National Human Genome Research Institute, Baltimore, MD, USA.

---

\*To whom correspondence should be addressed: Département de Médecine Sociale et Préventive, Université Laval, Québec,

## 1 **Abstract**

2 We previously demonstrated how sharing of rare variants (RVs) in distant affected relatives can be used to  
3 identify variants causing a complex and heterogeneous disease. This approach tested whether single RVs  
4 were shared by all sequenced affected family members. However, as with other study designs, joint analysis  
5 of several RVs (e.g. within genes) is sometimes required to obtain sufficient statistical power. Further,  
6 phenocopies can lead to false negatives for some causal RVs if complete sharing among affecteds is required.  
7 Here we extend our methodology (Rare Variant Sharing, RVS) to address these issues. Specifically, we  
8 introduce gene-based analyses, a partial sharing test based on RV sharing probabilities for subsets of affected  
9 relatives and an haplotype-based RV definition. RVS also has the desirable features of not requiring external  
10 estimates of variant frequency or control samples, provides functionality to assess and address violations of  
11 key assumptions, and is available as open source software for genome-wide analysis. Simulations including  
12 phenocopies, based on the families of an oral cleft study, revealed the partial and complete sharing versions  
13 of RVS achieved similar statistical power compared to alternative methods (RareIBD and the Gene-Based  
14 Segregation Test), and had superior power compared to the pedigree Variant Annotation, Analysis and  
15 Search Tool (pVAAST) linkage statistic. In studies of multiplex cleft families, analysis of rare single  
16 nucleotide variants in the exome of 151 affected relatives from 54 families revealed no significant excess  
17 sharing in any one gene, but highlighted different patterns of sharing revealed by the complete and partial  
18 sharing tests.

19 **KEYWORDS:** Family studies; identity by descent; oral clefts; variant sharing.

1 Sequencing distant relatives is an established approach to identify causal variants for Mendelian disorders  
2 [e.g., Ng et al. 2010, Bamshad et al. 2011, Ionita-Laza et al. 2011]. Typically external databases are  
3 combined with variant filtering strategies to identify causal variants under the assumption of complete  
4 penetrance and the absence of phenocopies. Sequencing related individuals has also become an option to  
5 identify causal variants in non-Mendelian complex disorders [Aida et al. 1998, Dahl et al. 2001, Daoud et al.  
6 2009], although the rationale and strategies employed are more complicated. When familial phenotype  
7 aggregation is observed at a rate much higher than the prevalence in the general population, possible  
8 explanations include a shared familial environment or a relatively large familial "gene burden" [Isobe et al.  
9 2013, Mescheriakova et al. 2016]. Another explanation could be the presence of a rare but highly penetrant  
10 (Mendelian or near-Mendelian) causal variant. This phenomenon has been observed in many common  
11 complex diseases and disorders such as chronic obstructive pulmonary disease, breast and ovarian cancer,  
12 birth defects, Alzheimer's disease, and amyotrophic lateral sclerosis [Miki et al. 1994, Szabo and King 1995,  
13 Stratton 1996, Papassotiropoulos et al. 2006, Johnston et al. 2012, Bureau et al. 2014a].

14 We recently devised a statistical framework for such a setting, based on the notion that sequencing DNA in  
15 extended multiplex families can help to identify high penetrance causal variants too rare in the population to  
16 be detected through tests of association in population based studies, but co-segregating with disease within  
17 families [Bureau et al. 2014b]. Specifically, when only a few affected subjects per family are sequenced,  
18 evidence any one rare variant (RV) may be causal can be quantified from the probability of sharing  
19 alleles by all affected relatives, given it was seen in any one family member under the null hypothesis of  
20 complete absence of linkage and association. We presented a general framework for calculating such sharing  
21 probabilities when two or more affected subjects per family are sequenced, and showed how information  
22 from multiple families can be combined by calculating a p-value as the sum of the probabilities of sharing  
23 events at least as extreme [Bureau et al. 2014b]. We refer to this approach as RVS for Rare Variant Sharing.  
24 By sequencing three affected second cousins from a multiplex oral cleft family, we successfully employed  
25 this approach to identify a causal nonsense mutation in the gene *CDH1* [Bureau et al. 2014a].

1 Alternative approaches have also been proposed for the setting where the causal variant is rare, in the  
2 sense that when it is seen identical by state (IBS) in multiple affected relatives it has to be identical  
3 by descent (IBD). Instead of using exact sharing probabilities, Sul et al. [2016] proposed to use as test  
4 statistic the sum of the number of affected subjects sharing a RV and the number of unaffected subjects  
5 without the RV (either of which can be zero), standardized by subtracting its expectation and dividing  
6 by its standard deviation within each family under the null hypothesis and the assumption that only one  
7 founder in the family introduced a causal variant. Further, in both approaches inference is conditional on  
8 the introduction of the RV by a single founder, and as a consequence we do not need to know or estimate  
9 its population allele frequency. This is a great benefit, as the allele frequency is commonly unknown,  
10 especially when sequenced families come from a genetic background not well represented in the standard  
11 reference databases such as the Exome Sequencing Project [Fu et al. 2013] or the 1000 Genomes Projects  
12 [1000 Genomes Project Consortium et al. 2015] , or the sample is a mix of families from different genetic  
13 backgrounds. Qiao et al. [2017] proposed GESE, a gene-based segregation test requiring an estimate of  
14 variant frequencies (as compared to calculating the probability of sharing conditional on the variant being  
15 observed), but otherwise relying on very similar assumptions as our previously introduced RVS approach  
16 [Bureau et al. 2014a]. Specifically, GESE (like RVS and RareIBD) assumes only one founder in the family  
17 introduced a causal variant in a gene, and Qiao et al. [2017] recommend limiting the tests to variants with  
18 high functional impact. Further, GESE also calculates the p-value as the sum of the probabilities of all  
19 events as or less likely as the observed event. However, in addition to absence of phenocopies (i.e., all  
20 affected subjects in a family are carriers), GESE assumes complete penetrance (i.e., all unaffected subjects  
21 do not carry the putative causal variant), while our original variant sharing approach was based only  
22 on sharing among affected subjects, and did not make any assumptions about unaffected subjects. The  
23 latter feature can be critically important, as was the case in detection of a nonsense mutation in *CDH1*  
24 shared among three affected second cousins, but also present in the unaffected parents who transmitted  
25 this variant [Bureau et al. 2014a, Figure 1]. We note GESE and RareIBD can be applied in "affected-only"

1 mode by setting the phenotype of unaffected subjects to unknown, even though not intended as such.

2 When reliable information about allele frequencies is available, some authors have argued for combining  
3 a linkage signal with the association signal derived using known allele frequencies to increase statistical  
4 power. Hu et al. [2014] proposed an extension of their previously developed Variant Annotation, Analysis  
5 and Search Tool (VAAST), a likelihood-ratio-based RV association test that incorporates case/control  
6 allele frequency differences and functional annotation into the likelihood. The aptly named pedigree-  
7 VAAST (pVAAST) employs a sequence-based model, where variants are tested for being directly causal  
8 instead of merely linked to some unobserved disease variant (as in classical linkage analysis) in variant and  
9 gene-based linkage analysis, and offers the option to combine this linkage information with the VAAST  
10 statistic. GESE calculates a probability of segregation combining association and linkage signals requiring  
11 knowledge (or an accurate estimate) of the variant frequency in the population. This feature of GESE  
12 has the potential to increase power, but misspecification of variant frequencies, which is likely in family  
13 samples with distinctly different or mixed genetic backgrounds, may yield spurious signals. Methods  
14 relying on filtering of variants based on frequencies in external databases such as our RVS approach and  
15 RareIBD are also susceptible to false positive signals from variants common in a study population but not  
16 well represented in the utilized reference databases. However, the haplotype structure around a variant  
17 contains information on the population frequency of variant that can be exploited to filter out common  
18 variants without producing a frequency estimate as required by pVAAST and GESE.

19 GESE, pVAAST and RareIBD are designed for analysis of all RVs in a gene or genomic region, as is standard  
20 when analyzing RVs to increase the proportion of subjects or families with at least one RV [Li and Leal 2008,  
21 Lee et al. 2014]. Here we present an extension of our previously published single-variant RVS method for a  
22 gene-based approach. Acknowledging phenocopies, diagnosis error and intra-familial genetic heterogeneity  
23 exist in complex disorders, we further extend our method by relaxing the previous assumption that all  
24 sequenced affected subjects must be carriers of the same causal variant, and by introducing an approach  
25 based on haplotypes of known variants to detect which variants are not actually rare in the study population

1 despite being rare or completely absent in reference databases. Comparing our gene-based RV sharing  
2 approach to alternative methods, we show in a simulation study that knowledge and use of allele frequencies  
3 of rare variants in approaches such as GESE and the pVAAST linkage statistic does not lead to power  
4 gains over methods such as RVS and RareIBD, which do not require knowledge of such frequencies and are  
5 therefore more universally applicable. An implementation of our method RVS is available as open source  
6 software from the Bioconductor project at [bioconductor.org/packages/release/bioc/html/RVS.html](http://bioconductor.org/packages/release/bioc/html/RVS.html).

## 7 **Methods**

8 **Gene-based analysis:** We initially presented the RVS approach for single variants [Bureau et al. 2014b].  
9 As long as there is a single RV within a gene in the same family, the RVs are independent since the families  
10 are unrelated, and the information can simply be pooled together and analyzed jointly. The abundance of  
11 RVs in the human genome, however, implies that multiple RVs are likely to occur on the same haplotype  
12 over a region such as a gene. Such RVs have identical sharing patterns, and are indistinguishable in  
13 genetic analysis. Therefore, we redefine the units of analysis as the haplotypes of RVs over each genomic  
14 region instead of individual RVs themselves. Simply taking the minimal RV sharing probability among  
15 all RVs in the same gene in a family has the effect of merging RVs on the haplotype with the lowest  
16 sharing probability. We detail in the section "Recoding rare variants haplotypes for rare variant sharing  
17 computations" on page 7 a systematic approach to recode RVs into haplotypes based on genomic sequence.  
18 After this recoding, when two or more RVs (or haplotypes of several RVs) remain in the same gene in a  
19 family, we retain one RV per family to compute the RV sharing probability. We propose using those RVs  
20 with the sharing pattern yielding the lowest probability among all RVs present in the same gene. When we  
21 do this, the test is no longer exact; the resulting p-value becomes an approximation of the exact p-value.  
22 We examine the impact of this practice on Type I error in a simulation study, and in sequencing data from  
23 individuals drawn from multiplex cleft families.

1 **Partial sharing:** We define the following random variables:

2  $C_i$  represents the number of copies of the RV observed in the sequence of subject  $i$ ,

3  $F_j$  is the indicator variable that founder  $j$  introduced one copy of the RV into the pedigree, and

4  $D_{ij}$  is the number of generations (meioses) between subject  $i$  and his or her ancestor  $j$ .

5 For a set of  $n$  sequenced subjects for which the pedigree structure limits to one the number of copies of  
 6 the RV that they can share, we compute the probability that any subset of size  $k \leq n$  shares a given RV.

7 Without loss of generality, we assume the  $n$  subjects are ordered such that subjects  $1, \dots, k \leq n$  share the  
 8 RV, and thus:

$$\begin{aligned}
 & P(\text{the subset shares the RV}) \\
 &= P(C_1 = \dots = C_k = 1, C_{k+1} = \dots = C_n = 0 \mid C_1 + \dots + C_n \geq 1) \\
 &= \frac{P(C_1 = \dots = C_k = 1, C_{k+1} = \dots = C_n = 0)}{P(C_1 + \dots + C_n \geq 1)}. \tag{1}
 \end{aligned}$$

9 The numerator is computed using the relationship

$$\begin{aligned}
 & P(C_1 = \dots = C_k = 1, C_{k+1} \dots = C_n = 0) \\
 &= P(C_1 = \dots = C_k = 1) + \sum_{h=1}^{n-k} (-1)^h \sum_{s \in S_h} P(C_1 = \dots = C_k = C_{s_1} = \dots = C_{s_h} = 1) \tag{2}
 \end{aligned}$$

10 where  $S_h$  is the set of all subsets of size  $h$  among the  $n - k$  subjects not carrying the RV, and  $s_1, \dots, s_h$  are  
 11 the indices of the subjects belonging to such a subset  $s \in S_h$ . All terms on the right hand side are joint  
 12 sharing probabilities for a subset of  $k + h$  affected subjects, which can be computed using the approach  
 13 described in Section 2.1 of Bureau et al. [2014b]. Formulas for the denominator are also found there. To  
 14 simplify the notation, we define  $K = C_1 + \dots + C_n$ . For a single family, we define a RV sharing configuration  
 15 where  $k$  subjects share a RV as  $G_k = (C_1, \dots, C_n) \mid K = k$ . The p-value of this configuration  $G_k$  is the  
 16 sum of probabilities of all sharing configurations  $g$  with probability  $P_g = P(g \mid K \geq 1)$  lower or equal to

1 the probability of the observed configuration  $P_{G_k} = P(G_k | K \geq 1)$ , and with size  $k^{(g)} \geq k$ , i.e.:

$$p = \sum_{g | \{ P_g \leq P_{G_k} \text{ and } k^{(g)} \geq k \}} P_g \quad (3)$$

2 We note it is computationally advantageous to identify classes of all equiprobable configurations, to compute  
 3 their probability only once for a member of each class, and to multiply the probability by the number of  
 4 equiprobable configurations. Classes of equiprobable configurations are defined by exchangeable relatives  
 5 (e.g. siblings), and subsets of exchangeable relatives (e.g. sibships who represent sets of first cousins).

6 With  $M$  families where the same RV is observed, or where  $M$  distinct RVs are observed (a different  
 7 one in each family) in the same region (such as a gene), the configuration  $G_k = (G_{k_1}, \dots, G_{k_M})$  is a  
 8 vector of family-specific configurations containing the  $k_1, \dots, k_M$  subjects sharing a RV in the  $M$  families  
 9 (commonly a different RV in every family), with  $k = \sum_{m=1}^M k_m$ . The p-value is then computed by applying  
 10 the same criteria used for a single family, i.e. the probability of a global configuration  $g = (g_1, \dots, g_M)$  with  
 11  $k^{(g)} = \sum_{m=1}^M k_m^{(g)}$  affected subjects is obtained assuming independence of all family-specific configurations  
 12  $g_1, \dots, g_M$ :

$$p = \sum_{g | \{ P_g \leq P_{G_k} \text{ and } k^{(g)} \geq k \}} \prod_{m=1}^M P_{g_m} \quad (4)$$

13 In the current implementation,  $M$  is limited to 10 as the summation grows exponentially with  $M$ . This  
 14  $M$  is the number of families with a RV, not the maximum size of the family sample, as only a fraction of  
 15 families harbor RVs in any given gene.

16 **Refining the definition of RVs:** The assumption that all copies of a RV seen in related members of a  
 17 pedigree are IBD is crucial to the validity of the RVS tests. Instead of relying solely on filtering of common  
 18 variants based on their frequencies in external reference databases, genome-wide genotype data enables  
 19 the identification of variants actually introduced multiple times to the family from unrelated founders and  
 20 most likely not rare in the population from which the family is drawn. Our approach is based on haplotypes  
 21 of known variants (common and rare). RVs seen on two or more haplotypes are discarded as introduced



1 multiple times into the family, e.g. being IBS without being IBD. We infer haplotypes by phasing the  
2 sequence data in families prior to analysis. Given the need to include a sufficient number of common variants  
3 within a genomic interval spanning a gene, and to ensure the quality of phasing, this approach is advisable  
4 only with genomic sequence and not with capture-based exome sequencing data alone. Our implementation  
5 uses Shapeit2 available at [mathgen.stats.ox.ac.uk/genetics\\_software/shapeit/shapeit.html](http://mathgen.stats.ox.ac.uk/genetics_software/shapeit/shapeit.html), with  
6 the duoHMM option to improve phasing where parent-offspring pairs are sequenced [O’Connell et al. 2014].  
7 Haplotypes for the purpose of determining IBD status are comprised of variants previously observed in  
8 genomic sequence databases (such as the 1000 Genomes project), as these variants are less likely to be  
9 sequencing errors. They may include RVs included in the analysis, depending on the filter used to define  
10 a RV. We have opted to include all variants within the RefSeq gene boundaries in the inferred haplotypes.

11 **Recoding rare variant haplotypes for rare variant sharing computations:** Once RVs have been  
12 assigned to haplotypes, those haplotypes containing at least one RV meeting the filtering criteria are recoded  
13 as a new synthetic RV representing all the RVs on that haplotype. Hence, there are as many recoded RVs in  
14 the analysis region as there are different haplotypes bearing at least one RV. The RV sharing probabilities  
15 are then computed for each recoded RV. In the same spirit, Sul et al. [2016] considered variants with the  
16 same genotype in all family members as duplicates and used one of those variants in the computation of  
17 the RareIBD statistic.

18 **Implementation:** Our RVS approach is freely available through the RVS Bioconductor package (Sherman  
19 T, Fu J, Scharpf RB, Bureau A, Ruczinski I. 2018. Detection of rare disease variants in extended pedigrees  
20 using RVS, in preparation). Briefly, the main function `RVgene` takes as input a data frame with pedigree  
21 and genotype data in standard formats (two alleles of a variant on two consecutive columns or minor  
22 allele count on one column) In addition, lists of RV sharing probabilities (pre-computed by the `RVsharing`  
23 function) and numbers of affected subjects for each possible sharing configuration of the sequenced affected  
24 members from every family must be provided to the `RVgene` function to perform the test allowing for partial  
25 sharing. Due to the computational demand of the convolution of the RV sharing event distribution for all

1 families involved, the number of families with RVs in the same gene is currently limited to 10, or fewer  
2 depending on available RAM (the complete sharing test does not have this limitation). Another new  
3 feature of the RVS package is its correction of sharing probabilities to account for cryptic relatedness using  
4 the analytical approximation described in Bureau et al. [2014b], based on a reimplementaion of the RV  
5 sharing probability computation using the gRain package for general computations on Bayesian networks.  
6 The previous Monte Carlo approximation for cryptic relatedness correction has also been reimplemented.

7 **Simulation study:** We used 594 phased sequences from the CEU, TSI and GBR samples of the 1000  
8 Genomes Project to define a population of haplotypes for each gene in the genome. Single nucleotide  
9 variants (SNVs) seen more than once in this sample were used to define recoding haplotypes. RVs were  
10 defined as SNVs with frequency  $< 1\%$  among the 594 sequences (up to 5 copies). To evaluate haplotype  
11 recoding in the context of a sequencing study with a family sample, we assumed a genetic origin to the  
12 disease in all families and used the 47 simple pedigree structures (i.e., not allowing inbreeding or marriage  
13 loops, removing 7 inbred pedigrees to limit computational complexity) from the second set of multiplex  
14 cleft families (see section "Multiplex oral cleft families" on page 10). To evaluate statistical properties of  
15 this test, focusing on distant affected relatives for which the RVS tests are designed, we further removed  
16 the 14 pedigrees with affected 1<sup>st</sup> degree relatives, leaving 33 simple pedigrees including 93 affected 2<sup>nd</sup> –  
17 9<sup>th</sup> degree relatives. We assumed the disease had a genetic origin in 16 families (randomly sampled at each  
18 replicate) or about 50% of all available families. For each RefSeq gene, each family where the disease had a  
19 genetic origin was assigned a RV as potential disease causing variant (a distinct RV for each family if there  
20 were enough RVs in the gene, otherwise RVs were reused across multiple families). The genotype at the  
21 causal RV site was generated conditional on disease status under the Risch 2-locus heterogeneity model  
22 of disease [Risch 1990, and Table 1], which means the potential causal RV was not necessarily present  
23 in the family (the disease could be caused by the other unlinked gene). The disease prevalence implied  
24 by this model was 2.5%. Founder haplotypes were then sampled from the population of all haplotypes,  
25 and transmission to descendants was simulated without recombination. Both haplotype sampling and

1 transmission were conditional on genotypes at the causal RV site. In families where the disease did not  
2 have a genetic origin (a subset of families for power evaluations, all families for assessment of Type I error  
3 under the null hypothesis), founder haplotype sampling was performed unconditionally, and transmission  
4 was simulated under Mendelian segregation instead.

| Locus            | MAF       | Penetrance                   |
|------------------|-----------|------------------------------|
| Tested           | $10^{-4}$ | $x \in \{0.25, 0.50, 0.75\}$ |
| Other            | 0.1       | 0.04                         |
| None (phenocopy) | NA        | 0.02                         |

**Table 1:** Model parameters used in the simulations (MAF: minor allele frequency).

5 We compared the statistical power of gene-based tests including the proposed RVS test allowing for partial  
6 sharing, the original RVS test (complete sharing), RareIBD [Sul et al. 2016], as well as two competing tests  
7 requiring external variant frequency estimates, namely GESE [Qiao et al. 2017] and the pVAAST LOD  
8 score [Hu et al. 2014]. We define RVs as variants with a minor allele frequency (MAF) less than 1%, and  
9 evaluated power for a gene with few coding RVs (*PEAR1*, 7 coding RVs) and a gene with many coding RVs  
10 (*CDH13*, 20 coding RVs). Separate simulation using RV penetrances of 0.25, 0.5 and 0.75 were conducted,  
11 corresponding to relative risks of about 10, 20 or 30 under the respective genetic models (Table 1). We  
12 also assessed Type I error of the gene-based tests in the context of a gene with many rare coding RVs  
13 (*CDH13*), where there were usually multiple RV-carrying haplotypes in the same gene in the same family.  
14 Both GESE (in the case where no external estimates are available, for example from public databases) and  
15 pVAAST require control samples, so we created samples of 5,000 control subjects by randomly sampling  
16 two haplotypes for each subject from the 594 phased 1000 Genome sequences. This is the minimal size  
17 recommended by Qiao et al. [2017] to ensure a correct Type I error for GESE. Variants with MAF less  
18 than 1% in the control data were selected. For pVAAST, we specified a genetic model where the tested RV  
19 was assumed to be dominant with a penetrance in the range 0.5 – 1.0 (the interval over which pVAAST

1 maximizes the LOD score). Since pVAAST requires specifying the amino acid substitution at the tested RV,  
2 we assumed a substitution with a mild effect (alanine to valine). The severity of the mutation is actually  
3 irrelevant for the linkage LOD score statistic, but is taken into account in the case-control composite  
4 likelihood ratio test (CLRT) which is added to the linkage LOD score to obtain the CLRT for pedigrees  
5 (CLRTp). Due to high computational demands of pVAAST, the number of Monte Carlo simulations to  
6 estimate the p-value was set to 10,000. For RareIBD and GESE, the number of resampling simulations  
7 was adaptively selected, increasing up to  $10^7$  for very small p-values. For GESE, we evaluated the Type  
8 I error with control samples drawn from a population with the correct MAF and a population where the  
9 true MAF of the RVs was 10 times lower to assess the impact of MAF misspecification. Again, due to  
10 excessive computational burden, assessment of the Type I error for pVAAST was limited to 200 replicates  
11 and was performed only under the latter control sample definition.

12 **Multiplex oral cleft families:** The first set of 55 multiplex cleft families was described in detail in  
13 Bureau et al. [2014a]. In brief, the families were mostly comprised of pairs of distant affected relatives  
14 with a few triples of distant affected relatives, on which whole exome sequencing (WES) was performed.  
15 We refer to this sample as the "WES sample". Two of the multiplex families in the WES sample were  
16 expanded to additional affected relatives, and included in the second set of families described below. For  
17 that reason, these two families were removed from the WES sample in the current analysis, leaving 53  
18 multiplex families. The second set included 54 multiplex cleft families from the Philippines, the United  
19 States (European ancestry), Guatemala and the Syrian Arab Republic. Whole genome sequencing (WGS)  
20 data were generated for 153 affected relatives and 7 unaffected relatives (all unaffected individuals were from  
21 Filipino families). We thus call this set the "WGS sample". In one Syrian pedigree, the 8 affected relatives  
22 did not have any known common ancestor, so a sub-pedigree including 6 affected relatives descending from  
23 a common couple of ancestors was used in the analysis, reducing the total number of affected subjects to  
24 151 (Table 2). The sequencing, alignment, and variant calling process was described in Holzinger et al.  
25 [2017], who also reported on RVs observed in the WGS data from the Filipino and Syrian families.

1 In addition to a large proportion of families with four or more affected relatives, the WGS sample differs  
2 from the WES sample by the presence of first degree relatives (Supplementary Table 1). Thus, the distri-  
3 bution of the  $-\log_{10}$  probabilities of sharing a RV by all affected relatives within the respective families  
4 (which is the potential  $-\log_{10}$  p-values when a RV is present in a single family) was more dispersed in the  
5 WGS than the WES sample (Supplementary Figure 4).

|                   | WES |    | WGS |    |
|-------------------|-----|----|-----|----|
|                   | S   | F  | S   | F  |
| Syrian            | 16  | 8  | 35  | 14 |
| Filipino          | 22  | 11 | 76  | 18 |
| Indian            | 26  | 12 | 12  | 6  |
| German            | 38  | 19 | 0   | 0  |
| Chinese/Asian     | 4   | 2  | 31  | 16 |
| European Ancestry | 2   | 1  | 12  | 5  |
| Guatemalan        | 0   | 0  | 4   | 2  |
| Total             | 108 | 53 | 151 | 54 |

**Table 2:** Number of affected individuals and families with nonsyndromic oral clefts, by DNA sequence approach (S: subjects; F: families).

6 SNVs from both WES and WGS data were annotated using wAnnovar ([wannovar.wglab.org](http://wannovar.wglab.org)) in November  
7 2016. Exonic and splice site SNVs were extracted and filtered using the same criteria as described in  
8 Bureau et al. [2014b], with the additional requirement of a maximum frequency of 1% in the gnomAD  
9 exome database ([gnomad.broadinstitute.org](http://gnomad.broadinstitute.org)), but dropping the previous step of filtering against the  
10 internal database of the Center for Inherited Disease Research. For the WGS data the above described  
11 haplotype-based approach was applied to ensure rare SNVs were introduced only once in each family. The  
12 duoHMM algorithm of Shapeit2 [O’Connell et al. 2014] made use of 37 parent-child duos of sequenced  
13 subjects to improve phasing, while the remaining 112 sequenced subjects were treated as unrelated (more  
14 distant sequenced relatives are not considered by the duoHMM algorithm). In the WES data, haplotyping

1 of SNVs on a SNP array (Illumina Omni Express) with Merlin was used to infer IBD sharing from common  
2 variants, but did not use rare SNVs. Gene-level p-values were computed for both partial and complete  
3 sharing tests, separately for the WES and WGS samples, using the above described approach.

## 4 Results

5 **Recoding of rare variant haplotypes:** It is possible for two or more RVs on distinct haplotypes to be on  
6 the same inferred haplotype (due to failure of the inferred haplotypes to distinguish all actual haplotypes),  
7 thus being incorrectly recoded together as one RV. To assess the frequency of such an event, we applied  
8 our RV haplotype recoding procedure to intervals defined from 5 kb upstream to the transcription end of  
9 each RefSeq gene (hg19 assembly) in a dataset simulated as described in the "Simulation study" section  
10 above. There were 18,272 genes with at least one coding RV in the CEU, TSI and GBR samples. Taking  
11 the original estimated haplotypes as the truth, we generated a total of 301,472 haplotypes with at least  
12 one coding RV (an average of 16.5 haplotypes per gene, or 0.35 per gene per family). For 92.8% of these  
13 RV-bearing haplotypes, all coding RVs recoded to that haplotype were on the same actual haplotype.

14 **Type I error, power, and scalability:** We computed the potential p-values as defined by Bureau et al.  
15 [2014b] for every replicate at every penetrance level. These potential p-values were generally less than  
16  $10^{-5}$ , and thus the simulated datasets were sufficiently informative to potentially reject the null hypothesis  
17 at the adopted significance levels. In the simulation under the null hypothesis, computation of the partial  
18 sharing gene-based test succeeded in 97% of 1000 replicates (those where RVs were seen in 10 or fewer  
19 families), and computation of the complete sharing test always succeeded in this simulation. Type I error  
20 was generally well controlled for RareIBD, the two versions of the RVS approach, and GESE when the  
21 MAF was correctly estimated. A slight inflation at the most extreme p-values was observed however,  
22 particularly for GESE (Figure 1). Type I error inflation was severe for the pVAAST CLRTp test, and  
23 somewhat substantial for GESE and pVAAST LOD when the MAF was underestimated by a factor of 10.

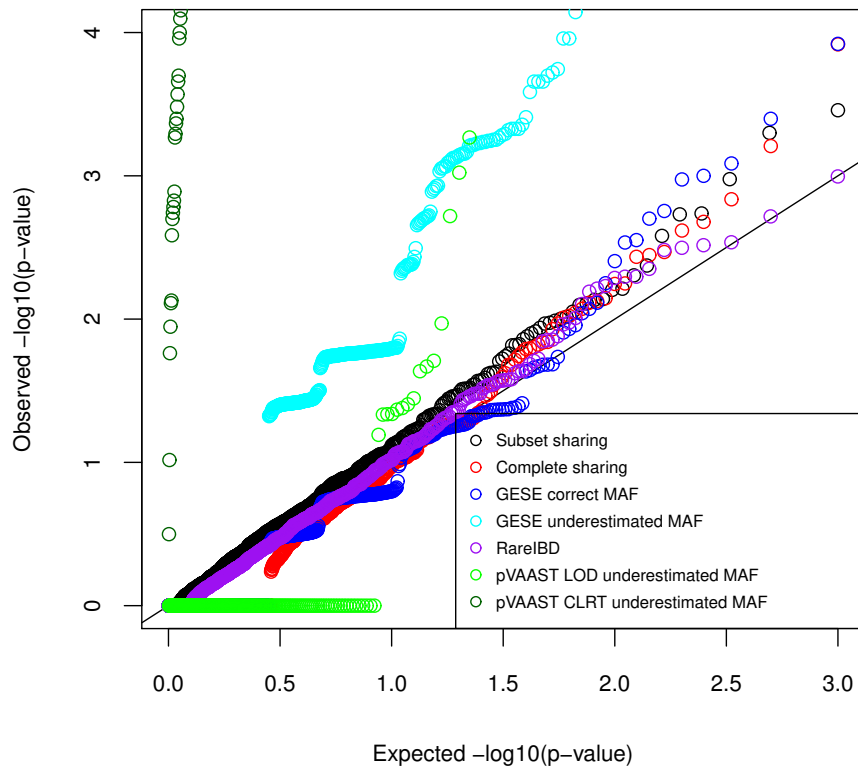

**Figure 1:** Expected and observed p-values under the null hypothesis in 1000 replicates (200 for pVAAST).

1 The performance of the gene-based tests at detecting causal RVs are compared for *PEAR1* (Figure 2, left)  
2 and *CDH13* (Figure 2, right). Computation of the subset sharing gene-based test succeeded in 96% and  
3 70% of replicates (where RVs were seen in 10 or fewer families) for *PEAR1* and *CDH13*, respectively. Since  
4 for pVAAST 10,000 simulations under the null did not allow us to estimate p-values below  $\alpha = 1 \times 10^{-5}$ ,  
5 we compared power of all methods at significance level  $\alpha = 1 \times 10^{-4}$ . In addition, Supplementary Figures 1  
6 and 2 show the power at significance level  $\alpha = 1 \times 10^{-5}$  for methods conditioning on the presence of at least  
7 one variant in a gene, and for GESE the more stringent  $\alpha = 2.5 \times 10^{-6}$  level, as suggested by Qiao et al.  
8 [2017] to correct for the total number of genes in the genome. Similarly, we divided the significance level by  
9 4 for the stringent GESE (Figure 2 with  $\alpha = 2.5 \times 10^{-5}$ ). Generally, all tests performed similarly, except the  
10 LOD test of pVAAST. RareIBD had in most instances slightly higher power than its nearest competitors.

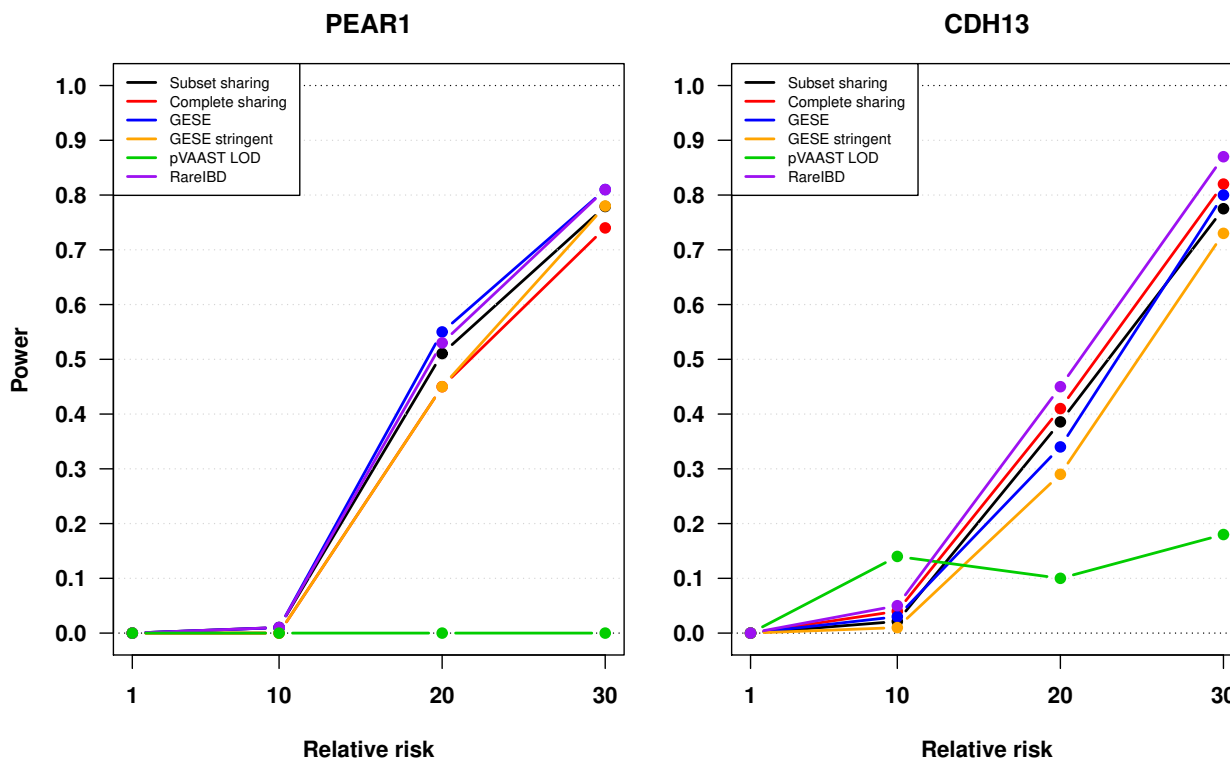

**Figure 2:** Power for genes *PEAR1* (left) and *CDH13* (right) under a genetic heterogeneity model with significance level  $\alpha = 10^{-4}$ .

1 The test allowing for sharing by a subset of subjects had slightly greater power than the complete sharing  
2 test for the small *PEAR1* gene and slightly lower power than the complete sharing test for the larger  
3 *CDH13* gene. GESE had lower power than RareIBD and the RVS tests when applying the stringent  
4 significance level suggested for GESE by Qiao et al. [2017], for a fair comparison with tests conditioning  
5 on the presence of at least one variant. Only when using the same  $\alpha = 1 \times 10^{-5}$  significance level as the  
6 other tests did GESE have slightly higher power in the small *PEAR1* gene (Supplementary Figure 1). The  
7 LOD test of pVAAST had low power, with the LOD score maximizing at 0 for all replicates in the small  
8 *PEAR1* gene and a majority of replicates in the larger *CDH13* gene. When the relative risk of causal RVs  
9 was equal to 10 and thus many unaffected carriers are expected, the linkage LOD test of pVAAST had  
10 higher power than the other methods in the large *CDH13* gene, but this power did not increase further at  
11 higher relative risks. The CLRTp combining linkage and case-control association signals gave the highest



1 power under all alternative models for both genes, which is due to additional information beyond variant  
2 segregation within families (examined here). Computing times for testing coding RVs in the gene *CDH13*  
3 in one replicate of the simulated dataset exhibited dramatic differences in scalability (Table 3), with the  
4 RVS complete sharing test taking the least computing time (even including the prior haplotype recoding)  
5 followed by GESE and the RVS partial sharing test. We also examined the correlation of the  $-\log_{10}$  p-  
6 values of the five tests and found the partial and complete sharing tests, GESE and RareIBD to be highly  
7 correlated, while these four tests are only weakly correlated to the pVAAST LOD test (Supplementary  
8 Figure 3, illustrated using gene *CDH13* with relative risk 20).

| Test                    | Time [ sec ] |
|-------------------------|--------------|
| RVS: haplotype recoding | 2            |
| RVS: complete sharing   | 1            |
| RVS: partial sharing    | 37           |
| GESE                    | 18           |
| RareIBD                 | 2,392        |
| pVAAST                  | 20,617       |

**Table 3:** Running times (in seconds) for analyzing rare coding variants in the gene *CDH13* in one simulated dataset, using a single 2.8 GHz Intel E7-4870 processor of a HP DL580R07 computer. For RareIBD and GESE, the number of resampling simulations was  $10^7$ . For pVAAST, the number of Monte Carlo simulations to estimate the p-value was 10,000.

9 **Analysis of the oral cleft exome sequence data in the WGS sample:** The number of genes with  
10 rare SNVs for which the RVS p-value computation succeeded in the WGS dataset was 12,706 for the partial,  
11 and 14,050 for the complete sharing test. We calculated Bonferroni-corrected significance thresholds using  
12 the number of genes with RVs for which the potential p-value as defined by Bureau et al. [2014b] would  
13 remain below 0.05 after applying the correction, and obtained 6,372 genes with potential p-values below  
14 the threshold  $0.05/6,372 = 7.8 \times 10^{-6}$  for a family-wise Type I error rate of 0.05 under the partial sharing

- 1 test, and 7,647 values below the threshold  $0.05/7,647 = 6.5 \times 10^{-6}$  for a family-wise Type I error rate of
- 2 0.05 under the complete sharing test.

| Gene    | Based on pedigree structure |                      | Adjusted for unknown relationships |                      |
|---------|-----------------------------|----------------------|------------------------------------|----------------------|
|         | Partial sharing             | Complete sharing     | Partial sharing                    | Complete sharing     |
| EP400NL | $4.8 \times 10^{-6}$        | $1.8 \times 10^{-6}$ | 0.0028                             | 0.0038               |
| SPATA21 | $2.3 \times 10^{-5}$        | $3.6 \times 10^{-6}$ | $3.7 \times 10^{-5}$               | $8.0 \times 10^{-6}$ |
| IL17RE  | $7.6 \times 10^{-5}$        | 0.037                | 0.0015                             | 0.0540               |

**Table 4:** The three most significant genes based on the partial sharing test applied to exonic SNVs with frequency  $\leq 1\%$  found in the whole genome sequence data of 151 relatives from a sample of 54 multiplex oral cleft families.

3 Among the top three genes based on the partial sharing test (Table 4), the genes *EP400NL* and *SPATA21*  
4 were also the top hits with the complete sharing test, which returned smaller p-values than the partial  
5 sharing test. In both genes, shared variants appear in families of Syrian origin, where unknown relationships  
6 are likely. We adjusted the RV sharing probabilities based on a mean kinship of 0.013 among founders,  
7 estimated from the Syrian families of the WES sample as we did previously [Bureau et al. 2014b]. This  
8 increased the sharing probabilities above the Bonferroni corrected significance threshold. The partial  
9 sharing test also detected the gene *IL17RE*, with eight families carrying a RV (Supplementary Figure 5).  
10 Four of these eight families were Syrian, and the adjustment for unknown relationships performed as before  
11 increased the p-value to 0.0015. Sharing by two or more subjects was observed in five families, but sharing  
12 by all affected relatives occurred in only two families, so the complete sharing p-value was much higher.

13 **False signals due to sharing IBS without IBD in the WES sample:** In the WES sample, we did  
14 not phase rare SNVs with common variants since we only had the exome sequence, and relied solely on  
15 filtering by variant frequency in the 1000 Genomes, Exome Sequencing Project and gnomAD (exome data)  
16 databases. Where there were multiple RVs in the same gene in a family, we retained the minimal RV  
17 sharing probability, effectively merging RVs with the lowest sharing probability. Excess RV sharing was

1 detected in the gene *ADAMTS9* using the complete sharing test. A supposedly rare SNV was present in  
2 at least one affected individual from 26 families: the variant was shared by the two affected subjects in  
3 seven families while the variant was seen in only one out of two affected subjects in 18 families and in only  
4 one out of three affected subjects in one family ( $p = 4.0 \times 10^{-6}$ ). Upon inspection of all SNVs from the  
5 genotyping array and Merlin-inferred haplotypes in *ADAMTS9*, there was evidence against SNVs being  
6 IBD between the affected relatives in five of the seven families where the variant was shared IBS (due  
7 to homozygous genotypes for opposite alleles in two affected relatives), including the three families where  
8 Bureau et al. [2014b] reported the G allele at rs149253049 was shared by two affected relatives.

9 **Rare SNVs in WES sample within genes with a signal in the WGS sample** We examined rare  
10 SNVs found in the WES sample within genes reported in Table 4. There were two rare SNVs in *EP400NL*,  
11 each seen in a single individual. There were two SNVs in *SPATA21* shared by two affected relatives (in  
12 two separate families), one of these two inferred IBD and the other not. Finally, a SNV in *IL17RE* shared  
13 IBS by two out of three relatives in one family could be inferred not to be IBD.

## 14 Discussion

15 This article introduced a number of improvements to the RVS approach for linking RVs to disease intro-  
16 duced by Bureau et al. [2014b]. The approach can now be applied to a gene-based analysis, the commonly  
17 used strategy to jointly test all RVs in a gene and increase the number of variant carriers [Li and Leal  
18 2008, Lee et al. 2014]. This requires a strategy to work with multiple RVs occurring in the same family.  
19 When genomic sequence is available, inferring haplotypes of common and previously known RVs within  
20 any one gene enables identification and merging of all RVs on the same haplotype prior to analysis, and  
21 avoids recomputation of the same RV sharing probability for each of these RVs. There may still remain  
22 RVs on different haplotypes within the same family. This is a rare occurrence even in genes with multiple  
23 RVs such as *CDH13* used in our simulation, and taking the minimal sharing probability among them did

1 not lead to inflated Type I errors in our simulation study.

2 Phenocopies, diagnosis errors and intra-familial genetic heterogeneity clearly exist, so causal RVs may  
3 not be shared by all affected relatives in any one pedigree. One way to detect excess sharing among  
4 sequenced family members is then to examine partial sharing, i.e. sharing by a subset of affected subjects  
5 in a family, and summing the probability of sharing patterns as or more extreme as the observed one within  
6 and between families when computing the p-value. The test allowing partial sharing had a slight power  
7 advantage over the complete sharing test for a gene with few RVs in our simulation based on the oral cleft  
8 families, but a slight power disadvantage for a gene with many RVs, despite simulating data under genetic  
9 models with phenocopies. This difference can be explained by an increased chance of partial sharing under  
10 the null hypothesis when there are many RVs, while sharing by all affected subjects remains rare. The  
11 exponential growth in computational complexity of the partial sharing test p-value calculation with the  
12 number of affected subjects in families with a RV restricts the size and number of families included in the  
13 analysis. Nonetheless, the partial sharing test may detect excess RV sharing patterns not detected by the  
14 complete sharing test, as exemplified by the sharing pattern observed in the *IL17RE* gene in our WGS  
15 sample (although cryptic relatedness in the population increased the p-value to a non significant level, so  
16 the observed sharing patterns may well result from RVs not involved in susceptibility to oral cleft).

17 Another way to detect excess sharing without requiring all affected subjects to share a RV is the RareIBD  
18 approach based on the number of affected subjects carrying a RV (and unaffected subjects not carrying the  
19 RV when such subjects are available). The RareIBD and RVS tests coincide in the special case where all  
20 pedigrees have only one affected relative pair of the same type (e.g. an affected first cousin pair), founders  
21 are not sequenced, and there is at most one RV per family in a given gene. The RareIBD score can then  
22 only take two values (2 or 1) in all families where a RV is seen, the same standardization of that score is  
23 applied in all these families [Equation 4 of Sul et al. 2016], and all families have the same weight in the  
24 weighted summation over families [Equation 5 of Sul et al. 2016]. The RareIBD Z-score is thus a linear  
25 function of the number of families where the score is 2, which under the null hypothesis follows a binomial

1 distribution with success probability being the probability of sharing a RV by both affected relatives given  
2 at least one is a carrier (e.g. 1/15 for affected first cousin pairs). In this setting both RVS tests simplify to  
3 the exact tail probability of the same null binomial distribution (and while our method provides a closed-  
4 form solution, the gene-dropping simulation used in RareIBD is sampling from the binomial distribution to  
5 compute the p-value). When all pedigrees have the same configuration of three or more affected subjects,  
6 there will be slight differences between RareIBD and each of the RVS tests due to differences in the  
7 ordering of the combinations of complete and partial sharing events across families, and hence of their null  
8 distributions. Nonetheless, the most extreme event where all affected subjects in all families share a RV has  
9 the same p-value, because the p-value is then again the probability of that most extreme event, whether it  
10 is computed exactly or by gene dropping. When different configurations of affected subjects are found in  
11 different pedigrees, as in our simulated pedigree sample, standardization and weighting of the pedigrees in  
12 Rare IBD introduces further differences with the RVS tests. The correlation between the  $-\log_{10}p$  of the  
13 RareIBD and each RVS test remains high, as evidenced in Supplementary Figure 3, but this figure also  
14 reveals datasets simulated with causal RVs where the RV sharing tests rejected the null hypothesis at a  
15 given significance threshold while RareIBD failed to reject it, and vice-versa. Computational complexity  
16 of evaluating the RareIBD statistic is linear in the number of subjects once the expectation and standard  
17 deviation of the number of subjects sharing a RV have been precomputed, but must be repeated on a large  
18 number of replicates of gene-dropping under the null hypothesis to obtain a p-value. As a result, for a  
19 dataset of typical size like our simulated dataset of 33 extended families, the time to compute the exact  
20 p-value of the partial sharing test can be substantially shorter than the time to compute the RareIBD  
21 p-value by gene-dropping simulations (Table 3).

22 The pVAAST approach combines the case-control and pedigree-based information in a single statistic  
23 (CLRTp), which achieved greater power than all other methods assessed (although the pVAAST linkage  
24 LOD score alone had low power). However, the CLRTp statistic is highly sensitive to inflation due to  
25 variant frequency underestimation, as it creates a frequency difference between the cases and controls

1 captured by the CLRT part of this statistic. The LOD score and, in a different way, the GESE statistic  
2 also involve the variant frequency and are inflated to a lesser extent by its underestimation. When families  
3 in a sample come from various populations, as was the case with the oral cleft families, methods that do  
4 not need variant frequencies can be validly applied to the whole sample, provided the analyzed variants  
5 are rare or absent in all populations of origin of the families, while methods requiring variant frequency  
6 estimates need to be applied separately in each population or use variant frequencies that are incorrect  
7 for most families if applied to all families together. Methods requiring variant frequency estimates also  
8 have the disadvantage that all genes with RVs seen in the control sample or reference database must be  
9 considered in the multiple testing correction, instead of only those genes with RVs seen in affected subjects.  
10 This reduces power, as exemplified in Figure 2 when a significance level 4 times lower was used following  
11 the suggestion of Qiao et al. [2017].

12 The second purpose of inferring haplotypes in the vicinity of a putative rare variant is to confirm the IBD  
13 status of the variants, and hence their rarity in the population. While no estimate of variant frequency  
14 is needed to compute RV sharing probabilities, the inference is nonetheless sensitive to the actual allele  
15 frequency in the population [Bureau et al. 2014b]. Variants rare in public databases of diverse human  
16 populations (such as the 1000 Genomes or gnomAD) may be not so rare in specific populations. For  
17 instance, observing the G allele at rs149253049 on six distinct haplotypes in as many affected subjects  
18 from three multiplex families suggested this allele is fairly common in the Bengali population from which  
19 these families were sampled. Placing RVs on haplotypes and keeping in the analysis only those found on  
20 a single haplotype within a pedigree, as we proposed here and applied to the WGS sample, increases our  
21 confidence that these RVs are indeed shared IBD. This is most feasible with whole genome sequence, where  
22 all variants are detected with the same technology. Phasing RVs from exome sequence data with SNVs  
23 from genotyping arrays would pose a challenge, and we did not implement such a procedure.

24 Haplotypes of known variants do not perfectly distinguish all haplotypes, and may lead to merging RVs  
25 actually on distinct haplotypes. Our assessment by simulation revealed such events have a moderate

1 probability of occurring in a sample. It is important to note that the same haplotype can be used to  
2 represent different variants in different families. Incorrect sharing inference happens only when two or  
3 more RVs assigned to the same haplotype occur in the same family. Also, there may be recombination  
4 events occurring within a gene in recent generations resulting in IBD copies of a RV on distinct haplotypes  
5 spanning a single gene. Future development will include an improvement of our approach to identify recent  
6 recombination events, and define haplotypes over the intervals between recombination events instead of  
7 only relying on gene boundaries.

8 Software user-friendliness is an important factor driving the adoption of methods in statistical genetics. Our  
9 RV sharing tests and GESE are available as R packages, and interface with data classes for pedigrees and  
10 genotype data defined in the R statistical environment ([cran.r-project.org](http://cran.r-project.org)). Users familiar with this  
11 environment already know how to use functions from other R packages to read data in the most common  
12 format such as variant call format (VCF) and ped, and convert them to these data classes. RareIBD  
13 and pVAAST are available as stand-alone software packages, and require data input files in their own  
14 format. External scripting or calls to provided formatting scripts are needed to reformat data files, which  
15 may represent important hurdles for some users. The handling of missing genotypes also distinguishes  
16 the evaluated RV analysis packages: our methods and GESE focus on RVs seen in the sequence with  
17 missing genotypes treated as the reference allele homozygous genotype, while pVAAST sums over all  
18 possible genotypes and RareIBD requires complete genotype data, so missing genotypes must be imputed  
19 externally prior to calling the program.

20 In conclusion, the additional features of a gene-based analysis of RV sharing with confirmation of IBD  
21 status of variants by inferring haplotypes from genomic sequence data does enhance the ability of our  
22 RV sharing approach to detect causal RVs in studies of extended multiplex families, while maintaining  
23 its original advantage of not requiring variant frequency estimates from a population sample. Testing  
24 for partial sharing patterns offers an additional option to detect RVs involved in complex diseases where  
25 phenocopy, mis-diagnosis or intra-familial genetic heterogeneity exist, but this approach did not always

1 provide a power gain over computationally cheaper alternatives.

## 2 **Acknowledgements**

3 We thank the members of the families who participated in the oral cleft sequencing studies, and the field  
4 and laboratory staff who made this analysis possible. We thank Saeed Sabbah (Université Laval) for  
5 performing the haplotyping of SNVs in the WES sample. The statistical analysis work was partly funded  
6 by the Canadian Statistical Sciences Institute through a Collaborative Research Team grant of which AB  
7 is the leader. Software implementation was supported by NIDCR grant R03-DE-02579 to IR. The oral cleft  
8 sequencing studies were supported by the National Institutes of Health (R01-DE-014581, U01-DE-018993,  
9 and U01 DE020073 to THB.; R01-DE-016148 and R01-DE-009886 to MLM.; P50-DE-016215 and R37-DE-  
10 08559 to JCM). Recruitment of Syrian families was supported by the Intramural Research Program of the  
11 National Human Genome Research Institute, National Institutes of Health, USA, and the Ibn Al-Nafees  
12 Hospital, Syrian Arab Republic. Additional support from X01HG006177 to THB, MLM, and JCM for  
13 whole exome sequencing at the Center for Inherited Disease Research, which is funded through a federal  
14 contract from the NIH to Johns Hopkins University (contract no. HHSN268200782096C).



## 15 **References**

- 1 1000 Genomes Project Consortium, Auton A, Brooks LD, Durbin RM, Garrison EP, Kang HM, Korb  
2 JO, Marchini JL, McCarthy S, McVean GA, Abecasis GR. 2015. A global reference for human genetic  
3 variation. *Nature* 526:68–74.
- 4 Aida H, Takakuwa K, Nagata H, Tsuneki I, Takano M, Tsuji S, Takahashi T, Sonoda T, Hatae M, Takahashi  
5 K, Hasegawa K, Mizunuma H, Toyoda N, Kamata H, Torii Y, Saito N, Tanaka K, Yakushiji M, Araki  
6 T, Tanaka K. 1998. Clinical features of ovarian cancer in Japanese women with germ-line mutations of  
7 *brca1*. *Clinical cancer research : an official journal of the American Association for Cancer Research*  
8 4:235–240.
- 9 Bamshad MJ, Ng SB, Bigham AW, Tabor HK, Emond MJ, Nickerson DA, Shendure J. 2011. Exome  
10 sequencing as a tool for Mendelian disease gene discovery. *Nature reviews Genetics* 12:745–755.
- 11 Bureau A, Parker MM, Ruczinski I, Taub MA, Marazita ML, Murray JC, Mangold E, Noethen MM, Ludwig  
12 KU, Hetmanski JB, Bailey-Wilson JE, Cropp CD, Li Q, Szymczak S, Albacha-Hejazi H, Alqosayer K,  
13 Field LL, Wu-Chou YH, Doheny KF, Ling H, Scott AF, Beaty TH. 2014a. Whole exome sequencing of  
14 distant relatives in multiplex families implicates rare variants in candidate genes for oral clefts. *Genetics*  
15 197:1039–1044.
- 16 Bureau A, Younkin SG, Parker MM, Bailey-Wilson JE, Marazita ML, Murray JC, Mangold E, Albacha-  
17 Hejazi H, Beaty TH, Ruczinski I. 2014b. Inferring rare disease risk variants based on exact probabilities  
18 of sharing by multiple affected relatives. *Bioinformatics (Oxford, England)* 30:2189–2196.
- 19 Dahl M, Nordestgaard BG, Lange P, Vestbo J, Tybjaerg-Hansen A. 2001. Molecular diagnosis of inter-  
20 mediate and severe alpha(1)-antitrypsin deficiency: Mz individuals with chronic obstructive pulmonary  
21 disease may have lower lung function than mm individuals. *Clinical chemistry* 47:56–62.
- 22 Daoud H, Valdmanis PN, Kabashi E, Dion P, Dupr N, Camu W, Meininger V, Rouleau GA. 2009. Con-

- 23   tribution of *tardbp* mutations to sporadic amyotrophic lateral sclerosis. *Journal of medical genetics*  
1   46:112–114.
- 2   Fu W, O'Connor TD, Jun G, Kang HM, Abecasis G, Leal SM, Gabriel S, Rieder MJ, Altshuler D, Shendure  
3   J, Nickerson DA, Bamshad MJ, Project NES, Akey JM. 2013. Analysis of 6,515 exomes reveals the recent  
4   origin of most human protein-coding variants. *Nature* 493:216–220.
- 5   Holzinger ER, Li Q, Parker MM, Hetmanski JB, Marazita ML, Mangold E, Ludwig KU, Taub MA, Begum  
6   F, Murray JC, Albacha-Hejazi H, Alqosayer K, Al-Souki G, Albasha Hejazi A, Scott AF, Beaty TH,  
7   Bailey-Wilson JE. 2017. Analysis of sequence data to identify potential risk variants for oral clefts in  
8   multiplex families. *Molecular Genetics and Genomic Medicine* 5:570–579.
- 9   Hu H, Roach JC, Coon H, Guthery SL, Voelkerding KV, Margraf RL, Durtschi JD, Tavtigian SV,  
10   Shankaracharya, Wu W, Scheet P, Wang S, Xing J, Glusman G, Hubley R, Li H, Garg V, Moore  
11   B, Hood L, Galas DJ, Srivastava D, Reese MG, Jorde LB, Yandell M, Huff CD. 2014. A unified test of  
12   linkage analysis and rare-variant association for analysis of pedigree sequence data. *Nature biotechnology*  
13   32:663–669.
- 14   Ionita-Laza I, Makarov V, Yoon S, Raby B, Buxbaum J, Nicolae DL, Lin X. 2011. Finding disease variants  
15   in mendelian disorders by using sequence data: methods and applications. *American journal of human*  
16   *genetics* 89:701–712.
- 17   Isobe N, Damotte V, Re VL, Ban M, Pappas D, Guillot-Noel L, Rebeix I, Compston A, Mack T, Cozen  
18   W, Fontaine B, Hauser SL, Oksenberg JR, Sawcer S, Gourraud PA. 2013. Genetic burden in multiple  
19   sclerosis families. *Genes and immunity* 14:434–440.
- 20   Johnston JJ, Rubinstein WS, Facio FM, Ng D, Singh LN, Teer JK, Mullikin JC, Biesecker LG. 2012.  
21   Secondary variants in individuals undergoing exome sequencing: screening of 572 individuals identifies  
22   high-penetrance mutations in cancer-susceptibility genes. *American journal of human genetics* 91:97–108.

- 23 Lee S, Abecasis G, Boehnke M, Lin X. 2014. Rare-variant association analysis: Study designs and statistical  
1 tests. *The American Journal of Human Genetics* 95:5 – 23.
- 2 Li B, Leal SM. 2008. Methods for detecting associations with rare variants for common diseases: application  
3 to analysis of sequence data. *Am J Hum Genet* 83:311–21.
- 4 Mescheriakova JY, Broer L, Wahedi S, Uitterlinden AG, van Duijn CM, Hintzen RQ. 2016. Burden  
5 of genetic risk variants in multiple sclerosis families in the netherlands. *Multiple sclerosis journal -  
6 experimental, translational and clinical* 2:2055217316648721.
- 7 Miki Y, Swensen J, Shattuck-Eidens D, Futreal PA, Harshman K, Tavtigian S, Liu Q, Cochran C, Bennett  
8 LM, Ding W. 1994. A strong candidate for the breast and ovarian cancer susceptibility gene *brca1*.  
9 *Science (New York, NY)* 266:66–71.
- 10 Ng SB, Buckingham KJ, Lee C, Bigham AW, Tabor HK, Dent KM, Huff CD, Shannon PT, Jabs EW,  
11 Nickerson DA, Shendure J, Bamshad MJ. 2010. Exome sequencing identifies the cause of a mendelian  
12 disorder. *Nature genetics* 42:30–35.
- 13 O’Connell J, Gurdasani D, Delaneau O, Pirastu N, Ulivi S, Cocca M, Traglia M, Huang J, Huffman JE,  
14 Rudan I, McQuillan R, Fraser RM, Campbell H, Polasek O, Asiki G, Ekoru K, Hayward C, Wright AF,  
15 Vitart V, Navarro P, Zagury JF, Wilson JF, Toniolo D, Gasparini P, Soranzo N, Sandhu MS, Marchini  
16 J. 2014. A general approach for haplotype phasing across the full spectrum of relatedness. *PLoS genetics*  
17 10:e1004234.
- 18 Papassotiropoulos A, Fountoulakis M, Dunckley T, Stephan DA, Reiman EM. 2006. Genetics, transcrip-  
19 tomics, and proteomics of alzheimer’s disease. *The Journal of clinical psychiatry* 67:652–670.
- 20 Qiao D, Lange C, Laird NM, Won S, Hersh CP, Morrow J, Hobbs BD, Lutz SM, Ruczinski I, Beaty  
21 TH, Silverman EK, Cho MH. 2017. Gene-based segregation method for identifying rare variants in  
22 family-based sequencing studies. *Genetic epidemiology* 41:309–319.

- 23 Risch N. 1990. Linkage strategies for genetically complex traits. i. multilocus models. American journal of  
1 human genetics 46:222–228.
- 2 Stratton MR. 1996. Recent advances in understanding of genetic susceptibility to breast cancer. Human  
3 molecular genetics 5 Spec No:1515–1519.
- 4 Sul JH, Cade BE, Cho MH, Qiao D, Silverman EK, Redline S, Sunyaev S. 2016. Increasing generality and  
5 power of rare-variant tests by utilizing extended pedigrees. The American Journal of Human Genetics  
6 99:846–859.
- 7 Szabo CI, King MC. 1995. Inherited breast and ovarian cancer. Human molecular genetics 4 Spec No:1811–  
8 1817.
